# Supplementary material for: Nanoparticle shape is the game-changer for blood–brain barrier crossing and delivery through tunneling nanotubes among glioblastoma cells
Source: Royal Society of Chemistry journal article supplement (doi:10.1039/d4nr03174a), 2024-11-08
Supplement: d4nr03174a1.pdf [file d4nr03174a1.pdf]

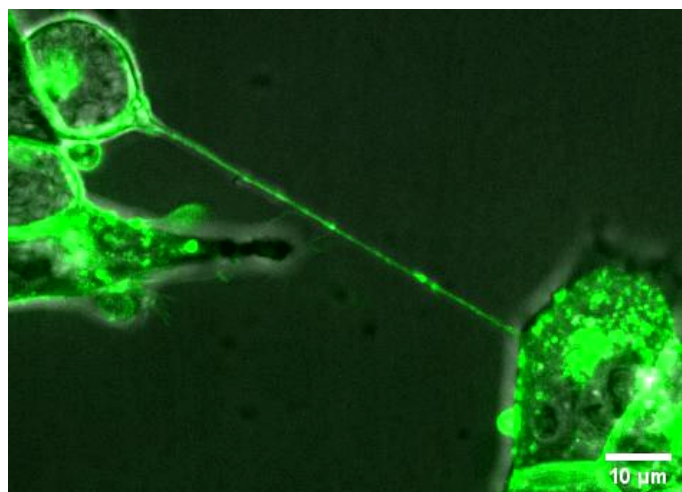

S1 movie. Video of GLI36 $\Delta$ EGFR-2 cells incubated with fluorescent-labelled nanoparticles acquired through a Z-projection (number of Z-stacks 10, Z-interval 0.5 $\mu$ m, time interval 0.5 sec) for a total duration of the movie of 8.5 min.
